# Supplementary material
Source: publisher figshare collection journal article supplement (https://springernature.figshare.com/ndownloader/files/14522501)
Supplement: Supplementary file [file 14522501]

## Validation of the V-HLO-Fr questionnaire

### Cognitive interview guide

English translation

**Family name**

**First name**

Education

Function

Age

Gender

If collaborating with an hospital, which one:

#### Standardised introduction

- Brief reminder of the framework (thesis project and notion of "Organizational Health Literacy") and the objective of the interview (to test a translation with "think aloud and probing" technique)
- Consent for recording?
- Scenario: "You are invited to participate in a group that assesses the quality of care in your hospital using a questionnaire"

#### 1) Clarity ("Comprehensibility")

"Read the questionnaire and think aloud. You do not have to comment on all the items, just do it when a thought comes to you. "

"All your thoughts are interesting, state them all."

"Focus your attention on comprehensibility (the primary goal is to test the translation)."

"Are the phrasing, words and concepts used clear to you? Do they mean specific things that would allow you to answer unambiguously? "

## 2) Relevance in term of quality improvement

Systematic probing at the end of each standard section and globally at the end of the reading

Standard 1

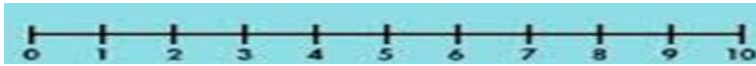

Comments:

Standard 2

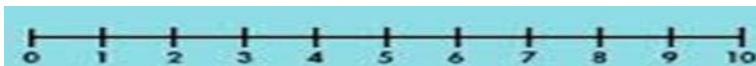

Standard 3



Standard 4

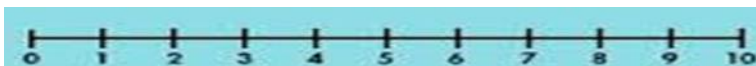

Standard 5



Standard 6

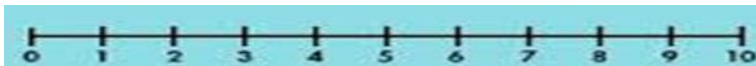

Standard 7

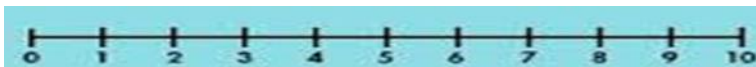

Standard 8



Standard 9

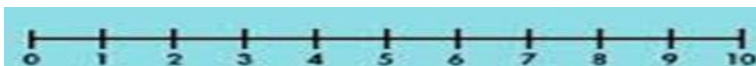

Globally

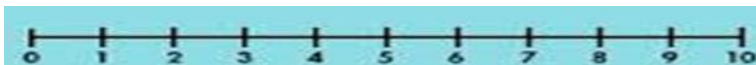

### **3) Applicability**

- How would the tool be applicable to :
  - one-off organisational diagnosis?
  - Benchmarking?
  - other uses?
  
- Collusion-complementarity with other existing quality approaches?
